# Supplementary material for: Biotransformation of bisphenol A analogues by the biphenyl-degrading bacterium Cupriavidusbasilensis - a structure-biotransformation relationship
Source: PubMed Central journal article supplement (PMC8282568; doi:10.1007/s00253-020-10406-4), 2020-03-03
Supplement: 253_2020_10406_MOESM1_ESM.pdf [file 253_2020_10406_MOESM1_ESM.pdf]

**Biotransformation of bisphenols by the biphenyl-degrading bacterium *Cupriavidus basilensis* – A structure-biotransformation relationship**

Marie-Katherin Zühlke<sup>1,2,3</sup>, Rabea Schlüter<sup>1</sup>, Annett Mikolasch<sup>1</sup>, Ann-Kristin Henning<sup>1</sup>, Martin Giersberg<sup>4</sup>, Michael Lalk<sup>5</sup>, Gotthard Kunze<sup>4</sup>, Thomas Schweder<sup>2,3</sup>, Tim Urich<sup>1</sup>, Frieder Schauer<sup>1</sup>

<sup>1</sup>Institute of Microbiology, University of Greifswald, Felix-Hausdorff-Straße 8, 17489 Greifswald, Germany

<sup>2</sup>Institute of Pharmacy, University of Greifswald, Felix-Hausdorff-Straße 3, 17489 Greifswald, Germany

<sup>3</sup>Institute of Marine Biotechnology, Walter-Rathenau-Straße 49a, 17489 Greifswald, Germany

<sup>4</sup>Leibniz Institute of Plant Genetics and Crop Plant Research (IPK), Corrensstraße 3, OT Gatersleben, 06466 Seeland, Germany

<sup>5</sup>Institute of Biochemistry, University of Greifswald, Felix-Hausdorff-Straße 4, 17489 Greifswald, Germany

**Corresponding author:** Rabea Schlüter, University of Greifswald, Institute of Microbiology, Felix-Hausdorff-Straße 8, 17489 Greifswald. Phone: +49-3834-864292. Fax: +49-3834-864202. e-mail: [rabea.schlueter@uni-greifswald.de](mailto:rabea.schlueter@uni-greifswald.de)

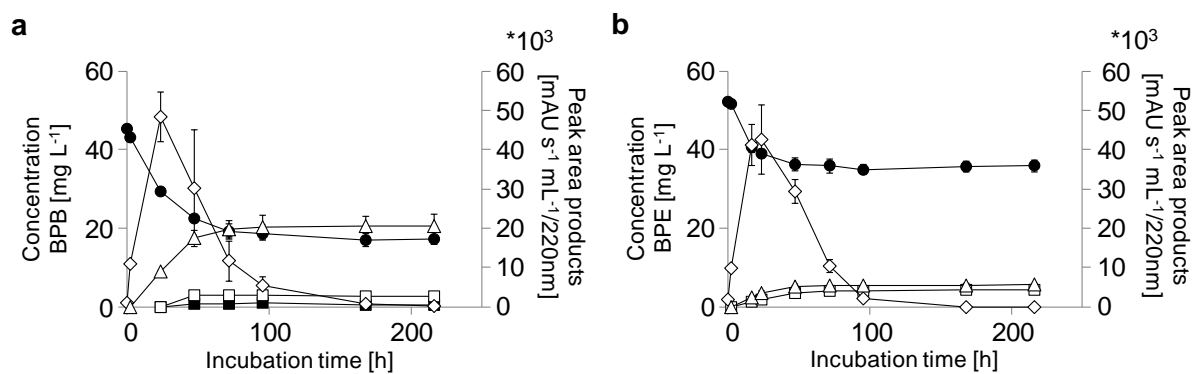

Fig. S1: Biotransformation of 0.006 % (a) BPB (●) and (b) BPE (●) as well as formation of corresponding product I (BP-OH;◇), product III (BP-lactone;△), product IV (BP-acetamide;□) and product V (BP-dimer;■) by *Cupriavidus basilensis* SBUG 290. Structures of bisphenols and their corresponding products are given in Table S9 (page 15/16)

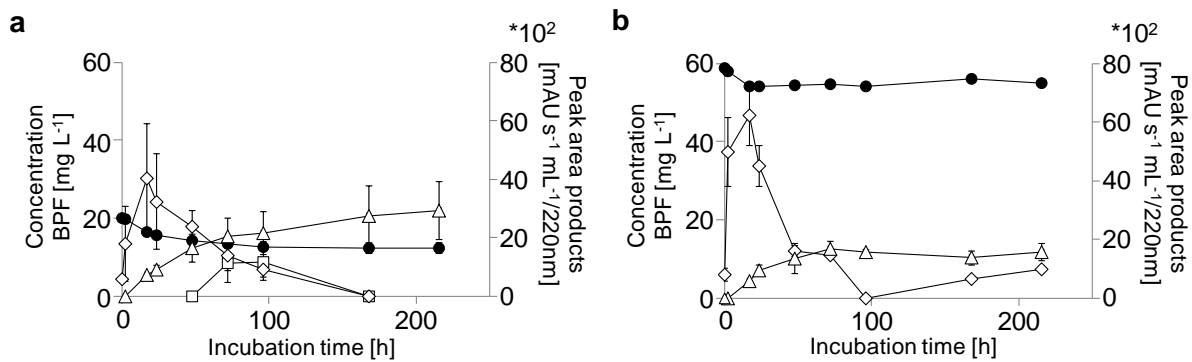

Fig. S2: Biotransformation of (a) 0.002 % BPF (●) and (b) 0.006 % BPF (●) as well as formation of corresponding product I<sub>BPF</sub> (BPF-OH;◇), product III<sub>BPF</sub> (BPF-lactone;△) and/or product IV<sub>BPF</sub> (BPF-acetamide;□) by *Cupriavidus basilensis* SBUG 290. In this case, kinetics for both concentrations of BPF are depicted as product IV was only detected using 0.002 % BPF. Structures of BPF and its corresponding products are given in Table S9 (page 15/16)

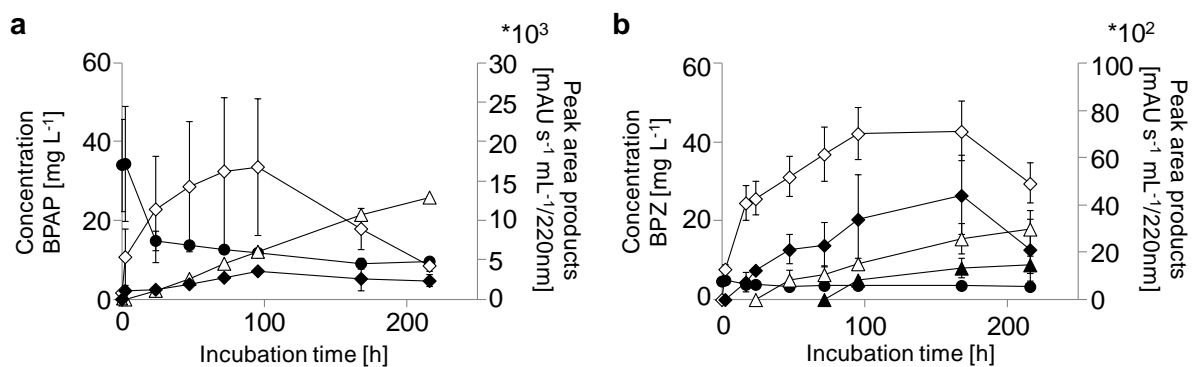

Fig. S3: Biotransformation of (a) 0.006 % BPAP (●) and (b) 0.002 % BPZ (●) as well as formation of corresponding product I (BP-OH;◇), product II (BP-2xOH;◆), product III (BP-lactone;△) and/or product VI (BP-lactone-OH;▲) by *Cupriavidus basilensis* SBUG 290. Structures of bisphenols and their corresponding products are given in Table S 9. Note that the detected bisphenol concentration is much lower than the applied concentration due to low solubility of these bisphenols in the medium

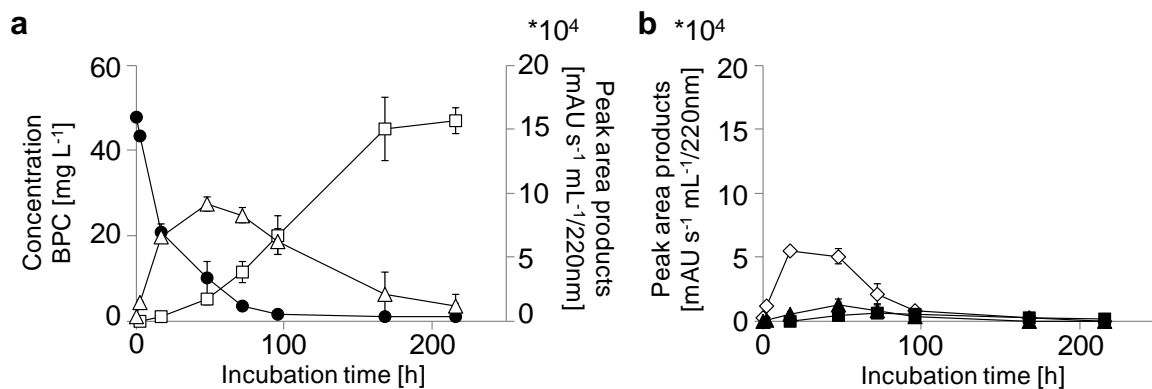

Fig. S4: Biotransformation of (a) 0.006 % BPC (●) and formation of product 1<sub>BPC</sub> (BPC-CH<sub>2</sub>OH;△) and product 2<sub>BPC</sub> (BPC-COOH;□) as well as (b) product 1<sub>BPC</sub> (BPC-OH;◇), product 3<sub>BPC</sub> (BPC-CH<sub>2</sub>OH-OH;▲) and product 4<sub>BPC</sub> (BPC-COOH-OH;■) by *Cupriavidus basilensis* SBUG 290. Structure of BPC and its corresponding products are given in Table S9 (page 15/16)

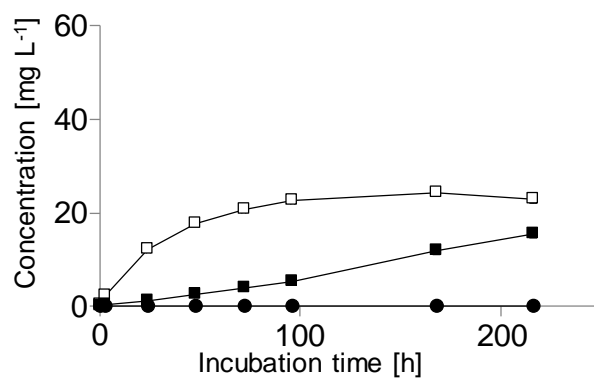

Fig. S5: Biotransformation of 0.002 % BPPH (●) and formation of product 2<sub>BPPH</sub> (BPPH-COOH;□) and product 5<sub>BPPH</sub> (BPPH-2xCOOH;■) by *Cupriavidus basilensis* SBUG 290. Structure of BPPH and its corresponding products are given in Table S9 (page 15/16). Note that the detected bisphenol concentration is much lower than the applied concentration due to low solubility of BPPH in the medium

Table S1: GC-MS and HPLC-MS data of bisphenol analogues and their *ortho*-hydroxylated products I (BP-OH) formed during the incubation of *Cupriavidus basilensis* SBUG 290 with BPAP, BPB, BPC, BPE, BPF, and BPZ in comparison to the corresponding product I<sub>BPA</sub> of BPA-transformation (Zühlke et al. 2017). Chemical structures and names of products are given in Table S9 (page 15/16)

| Bisphenol | Molecular weight (g mol <sup>-1</sup> ) | Product                   | Theoretical molecular weight (g mol <sup>-1</sup> ) | Mass difference between bisphenol and transformation product | HPLC-MS data                         |                                      | Base peak ion (GC-MS) and if applicable number of methylated derivatives <sup>a</sup>                                                                                   |
|-----------|-----------------------------------------|---------------------------|-----------------------------------------------------|--------------------------------------------------------------|--------------------------------------|--------------------------------------|-------------------------------------------------------------------------------------------------------------------------------------------------------------------------|
|           |                                         |                           |                                                     |                                                              | negative ion mode [M-H] <sup>-</sup> | positive ion mode [M+H] <sup>+</sup> |                                                                                                                                                                         |
| BPA       | 228                                     | product I <sub>BPA</sub>  | 244                                                 | Δ16 g mol <sup>-1</sup>                                      | <i>m/z</i> 243                       | n.d.                                 | 3x <i>m/z</i> 258 (M <sup>+</sup> +1CH <sub>3</sub> )<br>3x <i>m/z</i> 272 (M <sup>+</sup> +2CH <sub>3</sub> )<br>1x <i>m/z</i> 286 (M <sup>+</sup> +3CH <sub>3</sub> ) |
| BPAP      | 290                                     | product I <sub>BPAP</sub> | 306                                                 | Δ16 g mol <sup>-1</sup>                                      | <i>m/z</i> 305                       | n.d.                                 | 306 (M <sup>+</sup> )                                                                                                                                                   |
| BPB       | 242                                     | product I <sub>BPB</sub>  | 258                                                 | Δ16 g mol <sup>-1</sup>                                      | n.d.                                 | n.d.                                 | n.d.                                                                                                                                                                    |
| BPE       | 214                                     | product I <sub>BPE</sub>  | 230                                                 | Δ16 g mol <sup>-1</sup>                                      | <i>m/z</i> 229                       | n.d.                                 | 230 (M <sup>+</sup> )<br>2x <i>m/z</i> 244 (M <sup>+</sup> +1CH <sub>3</sub> )<br>1x <i>m/z</i> 258 (M <sup>+</sup> +2CH <sub>3</sub> )                                 |
| BPF       | 200                                     | product I <sub>BPF</sub>  | 216                                                 | Δ16 g mol <sup>-1</sup>                                      | n.d.                                 | n.d.                                 | n.d.                                                                                                                                                                    |
| BPZ       | 268                                     | product I <sub>BPZ</sub>  | 284                                                 | Δ16 g mol <sup>-1</sup>                                      | <i>m/z</i> 283                       | n.d.                                 | 2x <i>m/z</i> 298 (M <sup>+</sup> +1CH <sub>3</sub> )<br>3x <i>m/z</i> 312 (M <sup>+</sup> +2CH <sub>3</sub> )<br>1x <i>m/z</i> 326 (M <sup>+</sup> +3CH <sub>3</sub> ) |

n.d. not detected; <sup>a</sup>M<sup>+</sup>+1CH<sub>3</sub> monomethylated-, M<sup>+</sup>+2CH<sub>3</sub> dimethylated- or M<sup>+</sup>+3CH<sub>3</sub> trimethylated-derivative, 1-3x refers to number of detected derivatized substances: three hydroxyl groups within the molecule (see Table S 9) would allow up to three methylations and different combinations thereof to be detected by GC-MS

Table S2: NMR data and structure of product I<sub>BPE</sub> (BPE-OH) formed during the incubation of *Cupriavidus basilensis* SBUG 290 with BPE

| <sup>1</sup> H                            | <sup>1</sup> H- <sup>13</sup> C-correlation                           | <sup>13</sup> C | structure |
|-------------------------------------------|-----------------------------------------------------------------------|-----------------|-----------|
| 1.50, d, J = 7.2 Hz, 3H, H-8              | 44.6 C-7, 139.5 C-9, 140.4 C-4                                        | 22.8 C-8        |           |
| 3.89, q, J = 7.2 Hz, 1H, H-7              | 22.8 C-8, 115.9 C-3, 119.8 C-5, 129.4 C-10/C-14, 139.5 C-9, 140.4 C-4 | 44.6 C-7        |           |
| 6.53, dd, J = 1.6 Hz, J = 8.1 Hz, 1H, H-5 | 44.6 C-7, 115.9 C-3, 144.2 C-1                                        | 119.8 C-5       |           |
| 6.60, d(s), J = 1.6 Hz, 1H, H-3           | 44.6 C-7, 119.8 C-5, 144.2 C-1, (146.0 C-2)                           | 115.9 C-3       |           |
| 6.66, d, 1H, H-6                          | 140.4 C-4, (144.2 C-1), 146.0 C-2                                     | 116.1 C-6       |           |
| 6.68, d, J = 8.5 Hz, 2H, H-11/H-13        | 116.0 C-11/C-13, 139.5 C-9, (156.4 C-12)                              | 116.0 C-11/C-13 |           |
| 7.00, d, J = 8.5 Hz, 2H, H-10/H-14        | 44.6 C-7, 129.4 C-10/C-14, 156.4 C-12                                 | 129.4 C-10/C-14 |           |
|                                           |                                                                       | 139.5 C-9       |           |
|                                           |                                                                       | 140.4 C-4       |           |
|                                           |                                                                       | 144.2 C-1       |           |
|                                           |                                                                       | 146.0 C-2       |           |
|                                           |                                                                       | 156.4 C-12      |           |



Table S3: GC-MS and HPLC-MS data of bisphenol analogues and their products II (*ortho*-hydroxylated at both phenol rings, BP-2xOH) formed during the incubation of *Cupriavidus basilensis* SBUG 290 with BPAP and BPZ in comparison to the corresponding product II<sub>BPA</sub> of BPA-transformation (Zühlke et al. 2017). Chemical structures and names of products are given in Table S9 (page 15/16)

| bisphenol | molecular weight (g mol <sup>-1</sup> ) | product                    | theoretical molecular weight (g mol <sup>-1</sup> ) | mass difference between bisphenol and transformation product | HPLC-MS data                         |                                      | Base peak ion (GC-MS) and if applicable number of methylated derivatives <sup>a</sup>                          |
|-----------|-----------------------------------------|----------------------------|-----------------------------------------------------|--------------------------------------------------------------|--------------------------------------|--------------------------------------|----------------------------------------------------------------------------------------------------------------|
|           |                                         |                            |                                                     |                                                              | negative ion mode [M-H] <sup>-</sup> | positive ion mode [M+H] <sup>+</sup> |                                                                                                                |
| BPA       | 228                                     | product II <sub>BPA</sub>  | 260                                                 | Δ32 g mol <sup>-1</sup>                                      | <i>m/z</i> 259                       | n.d.                                 | n.d.                                                                                                           |
| BPAP      | 290                                     | product II <sub>BPAP</sub> | 322                                                 | Δ32 g mol <sup>-1</sup>                                      | <i>m/z</i> 321                       | n.d.                                 | n.d.                                                                                                           |
| BPZ       | 268                                     | product II <sub>BPZ</sub>  | 300                                                 | Δ32 g mol <sup>-1</sup>                                      | <i>m/z</i> 299                       | n.d.                                 | 2x <i>m/z</i> 342 (M <sup>+</sup> +3CH <sub>3</sub> )<br>1x <i>m/z</i> 356 (M <sup>+</sup> +4CH <sub>3</sub> ) |

n.d. not detected; <sup>a</sup>M<sup>+</sup>+3CH<sub>3</sub> trimethylated- or M<sup>+</sup>+4CH<sub>3</sub> tetramethylated-derivative, 1-2x refers to number of detected derivatized substances: four hydroxyl groups within the molecule (see Table S 9) would allow up to four methylations and different combinations thereof to be detected by GC-MS

Table S4: GC-MS and HPLC-MS data of bisphenol analogues and their products III (ring fission products, BP-lactone) formed during the incubation of *Cupriavidus basilensis* SBUG 290 with BPAP, BPB, BPE, BPF, and BPZ in comparison to the corresponding product III<sub>BPA</sub> of BPA-transformation (Zühlke et al. 2017). Chemical structures and names of products are given in Table S9 (page 15/16)

| bisphenol | molecular weight (g mol <sup>-1</sup> ) | product                     | theoretical molecular weight (g mol <sup>-1</sup> ) | mass difference between bisphenol and transformation product | HPLC-MS data                         |                                      | Base peak ion (GC-MS) and if applicable number of methylated derivatives <sup>a</sup>                          |
|-----------|-----------------------------------------|-----------------------------|-----------------------------------------------------|--------------------------------------------------------------|--------------------------------------|--------------------------------------|----------------------------------------------------------------------------------------------------------------|
|           |                                         |                             |                                                     |                                                              | negative ion mode [M-H] <sup>-</sup> | positive ion mode [M+H] <sup>+</sup> |                                                                                                                |
| BPA       | 228                                     | product III <sub>BPA</sub>  | 274                                                 | Δ46 g mol <sup>-1</sup>                                      | <i>m/z</i> 273                       | <i>m/z</i> 275                       | 1x <i>m/z</i> 302 (M <sup>+</sup> +2CH <sub>3</sub> )                                                          |
| BPAP      | 290                                     | product III <sub>BPAP</sub> | 336                                                 | Δ46 g mol <sup>-1</sup>                                      | <i>m/z</i> 335                       | <i>m/z</i> 337                       | n.d.                                                                                                           |
| BPB       | 242                                     | product III <sub>BPB</sub>  | 288                                                 | Δ46 g mol <sup>-1</sup>                                      | <i>m/z</i> 287                       | <i>m/z</i> 289                       | 1x <i>m/z</i> 302 (M <sup>+</sup> +1CH <sub>3</sub> )<br>1x <i>m/z</i> 316 (M <sup>+</sup> +2CH <sub>3</sub> ) |
| BPE       | 214                                     | product III <sub>BPE</sub>  | 260                                                 | Δ46 g mol <sup>-1</sup>                                      | n.d.                                 | <i>m/z</i> 261                       | 1x <i>m/z</i> 274 (M <sup>+</sup> +1CH <sub>3</sub> )<br>1x <i>m/z</i> 288 (M <sup>+</sup> +2CH <sub>3</sub> ) |
| BPF       | 200                                     | product III <sub>BPF</sub>  | 246                                                 | Δ46 g mol <sup>-1</sup>                                      | n.d.                                 | n.d.                                 | n.d.                                                                                                           |
| BPZ       | 268                                     | product III <sub>BPZ</sub>  | 314                                                 | Δ46 g mol <sup>-1</sup>                                      | <i>m/z</i> 313                       | <i>m/z</i> 315                       | 1x <i>m/z</i> 328 (M <sup>+</sup> +1CH <sub>3</sub> )<br>1x <i>m/z</i> 342 (M <sup>+</sup> +2CH <sub>3</sub> ) |

n.d. not detected; <sup>a</sup>M<sup>+</sup>+1CH<sub>3</sub> monomethylated- or M<sup>+</sup>+2CH<sub>3</sub> dimethylated-derivative, 1x refers to number of detected derivatized substances: one hydroxyl and one carboxyl group within the molecule (see Table S 9) would allow up to two methylations and different combinations thereof to be detected by GC-MS

Table S5: NMR data and structure of product III<sub>BPE</sub> (BPE-lactone) formed during the incubation of *Cupriavidus basilensis* SBUG 290 with BPE

| <sup>1</sup> H                     | <sup>1</sup> H- <sup>13</sup> C-correlation | <sup>13</sup> C | Structure |
|------------------------------------|---------------------------------------------|-----------------|-----------|
| 1.53, d, J = 7.1 Hz, 3H, H-9       | not performed                               | not performed   |           |
| 3.89, q, J = 7.1 Hz, 1H, H-8       |                                             |                 |           |
| 6.24, s, 1H, H-3                   |                                             |                 |           |
| 6.74, d, J = 8.4 Hz, 2H, H-12/H14  |                                             |                 |           |
| 6.85, s, 1H, H-5                   |                                             |                 |           |
| 7.07, d, J = 8.4 Hz, 2H, H-11/H-15 |                                             |                 |           |

Table S6: GC-MS and HPLC-MS data of bisphenol analogues and their products IV (products with an acetamide substituent, BP-acetamide) formed during the incubation of *Cupriavidus basilensis* SBUG 290 with BPB, BPE, and BPF in comparison to the corresponding product IV<sub>BPA</sub> of BPA-transformation (Zühlke et al. 2017). Chemical structures and names of products are given in Table S9 (page 15/16)

| bisphenol | molecular weight (g mol <sup>-1</sup> ) | product                                | theoretical molecular weight (g mol <sup>-1</sup> ) | mass difference between bisphenol and transformation product | HPLC-MS data                         |                                      | Base peak ion (GC-MS) and if applicable number of methylated derivatives <sup>a</sup>     |
|-----------|-----------------------------------------|----------------------------------------|-----------------------------------------------------|--------------------------------------------------------------|--------------------------------------|--------------------------------------|-------------------------------------------------------------------------------------------|
|           |                                         |                                        |                                                     |                                                              | negative ion mode [M-H] <sup>-</sup> | positive ion mode [M+H] <sup>+</sup> |                                                                                           |
| BPA       | 228                                     | <sup>1</sup> product IV <sub>BPA</sub> | 285                                                 | Δ57 g mol <sup>-1</sup>                                      | <i>m/z</i> 284                       | <i>m/z</i> 286                       | n.d.                                                                                      |
| BPB       | 242                                     | product IV <sub>BPB</sub>              | 299                                                 | Δ57 g mol <sup>-1</sup>                                      | <i>m/z</i> 298                       | <i>m/z</i> 300                       | n.d.                                                                                      |
| BPE       | 214                                     | product IV <sub>BPE</sub>              | 271                                                 | Δ57 g mol <sup>-1</sup>                                      | n.d.                                 | <i>m/z</i> 272                       | <i>m/z</i> 271 (M <sup>+</sup> )<br>1x <i>m/z</i> 285 (M <sup>+</sup> +1CH <sub>3</sub> ) |
| BPF       | 200                                     | product IV <sub>BPF</sub>              | 257                                                 | Δ57 g mol <sup>-1</sup>                                      | n.d.                                 | <i>m/z</i> 258                       | n.d.                                                                                      |

n.d. not detected; <sup>a</sup>M<sup>+</sup>+1CH<sub>3</sub> monomethylated-derivative, 1x refers to number of detected derivatized substances: two hydroxyl groups within the molecule (see Table S 9) would allow up to two methylations and different combinations thereof to be detected by GC-MS

Table S7: NMR data and structure of product IV<sub>BPE</sub> (BPE-acetamide) formed during the incubation of *Cupriavidus basilensis* SBUG 290 with BPE

| <sup>1</sup> H                                                   | <sup>1</sup> H- <sup>13</sup> C-correlation | <sup>13</sup> C | Structure |
|------------------------------------------------------------------|---------------------------------------------|-----------------|-----------|
| 1.53, d, J = 7.1 Hz, 3H, H-8                                     | not performed                               | not performed   |           |
| 3.96, q, J = 7.1 Hz, 1H, H-7                                     |                                             |                 |           |
| 6.68, m, J = 8.3 Hz, 4H (1s 1H, 1d 1H, 1d 2H), H-3/H-5/H-11/H-13 |                                             |                 |           |
| 7.01, d, J = 8.3 Hz, 2H + 1H, H-10/H-14                          |                                             |                 |           |
| 7.41, d, J = 8.1 Hz, 1H, H-6                                     |                                             |                 |           |

Table S8: GC-MS and HPLC-MS data of the *ortho*-hydroxylated ring fission product VI<sub>BPZ</sub> (BPZ-lactone-OH) in comparison to the non-hydroxylated ring fission product III<sub>BPZ</sub> (BPZ-lactone), both formed during the incubation of *Cupriavidus basilensis* SBUG 290 with BPZ. Chemical structures and names of products are given in Table S9 (page 15/16)

| product                    | theoretical molecular weight (g mol <sup>-1</sup> ) | mass difference between both transformation products | HPLC-MS data                            |                                         | Base peak ion (GC-MS) and if applicable number of methylated derivatives <sup>a</sup> |
|----------------------------|-----------------------------------------------------|------------------------------------------------------|-----------------------------------------|-----------------------------------------|---------------------------------------------------------------------------------------|
|                            |                                                     |                                                      | negative ion mode<br>[M-H] <sup>-</sup> | positive ion mode<br>[M+H] <sup>+</sup> |                                                                                       |
| Product III <sub>BPZ</sub> | 314                                                 | Δ16 g mol <sup>-1</sup>                              | <i>m/z</i> 313                          | <i>m/z</i> 315                          | 1x <i>m/z</i> 328 (M <sup>+</sup> +1CH <sub>3</sub> )                                 |
| Product VI <sub>BPZ</sub>  | 330                                                 |                                                      | <i>m/z</i> 329                          | <i>m/z</i> 331                          | 1x <i>m/z</i> 342 (M <sup>+</sup> +2CH <sub>3</sub> )                                 |
|                            |                                                     |                                                      |                                         |                                         | 1x <i>m/z</i> 372 (M <sup>+</sup> +3CH <sub>3</sub> )                                 |

<sup>a</sup>M<sup>+</sup>+1CH<sub>3</sub> monomethylated-, M<sup>+</sup>+2CH<sub>3</sub> dimethylated- or M<sup>+</sup>+3CH<sub>3</sub> trimethylated-derivative, 1x refers to number of detected derivatized substances: one or two hydroxyl groups and one carboxyl group within the molecule (see Table S 9) allow two up to three methylations and different combinations thereof to be detected by GC-MS

Table S9: Postulated structure and chemical name of the products formed during the incubation of *Cupriavidus basilensis* SBUG 290 with various bisphenol analogues

| Substrate                                               | Product                                       | Postulated structure                 | Postulated name                                                                    |
|---------------------------------------------------------|-----------------------------------------------|--------------------------------------|------------------------------------------------------------------------------------|
| BPAP                                                    | product I <sub>BPAP</sub><br>(BPAP-OH)        |                                      | 4-[1-(4-hydroxyphenyl)-1-phenylethyl]benzene-1,2-diol                              |
|                                                         | product II <sub>BPAP</sub><br>(BPAP-2xOH)     |                                      | 4-[1-(3,4-dihydroxyphenyl)-1-phenylethyl]benzene-1,2-diol                          |
|                                                         | product III <sub>BPAP</sub><br>(BPAP-lactone) |                                      | 4-[1-(4-hydroxyphenyl)-1-phenylethyl]-6-oxo-6H-pyran-2-carboxylic acid             |
| BPB                                                     | product I <sub>BPB</sub><br>(BPB-OH)          |                                      | 4-[1-(4-hydroxyphenyl)-1-methyl-propyl]benzene-1,2-diol                            |
|                                                         | product III <sub>BPB</sub><br>(BPB-lactone)   |                                      | 4-[1-(4-hydroxyphenyl)-1-methyl-propyl]-6-oxo-pyran-2-carboxylic acid              |
|                                                         | product IV <sub>BPB</sub><br>(BPB-acetamide)  |                                      | N-[2-hydroxy-4-[1-(4-hydroxyphenyl)-1-methyl-propyl]phenyl]acetamide               |
|                                                         | product V <sub>BPB</sub><br>(BPB-dimer)       | dimer of modified BPB monomers       |                                                                                    |
|                                                         | BPC                                           | product I <sub>BPC</sub><br>(BPC-OH) |                                                                                    |
| product 1 <sub>BPC</sub><br>(BPC-CH <sub>2</sub> OH)    |                                               |                                      | 2-(hydroxymethyl)-4-[1-(4-hydroxy-3-methyl-phenyl)-1-methyl-ethyl]-phenol          |
| product 2 <sub>BPC</sub><br>(BPC-COOH)                  |                                               |                                      | 2-hydroxy-5-[1-(4-hydroxy-3-methyl-phenyl)-1-methyl-ethyl]benzoic acid             |
| product 3 <sub>BPC</sub><br>(BPC-CH <sub>2</sub> OH-OH) |                                               |                                      | 3-(hydroxymethyl)-5-[1-(4-hydroxy-3-methyl-phenyl)-1-methyl-ethyl]benzene-1,2-diol |
| product 4 <sub>BPC</sub><br>(BPC-COOH-OH)               |                                               |                                      | 2,3-dihydroxy-5-[1-(4-hydroxy-3-methyl-phenyl)-1-methyl-ethyl]benzoic acid         |

Table S9 continued

| Substrate | Product                                      | Postulated structure | Postulated name                                                          |
|-----------|----------------------------------------------|----------------------|--------------------------------------------------------------------------|
| BPE       | product I <sub>BPE</sub><br>(BPE-OH)         |                      | 4-[1-(4-hydroxyphenyl)ethyl]benzene-1,2-diol                             |
|           | product III <sub>BPE</sub><br>(BPE-lactone)  |                      | 4-[1-(4-hydroxyphenyl)ethyl]-6-oxo-pyran-2-carboxylic acid               |
|           | product IV <sub>BPE</sub><br>(BPE-acetamide) |                      | N-[2-hydroxy-4-[1-(4-hydroxyphenyl)ethyl]phenyl]acetamide                |
| BPF       | product I <sub>BPF</sub><br>(BPF-OH)         |                      | 4-[(4-hydroxyphenyl)methyl]benzene-1,2-diol                              |
|           | product III <sub>BPF</sub><br>(BPF-lactone)  |                      | 4-[(4-hydroxyphenyl)methyl]-6-oxo-pyran-2-carboxylic acid                |
|           | product IV <sub>BPF</sub><br>(BPE-acetamide) |                      | N-[2-hydroxy-4-[(4-hydroxyphenyl)methyl]phenyl]acetamide                 |
| BPPH      | product 2 <sub>BPPH</sub><br>(BPPH-COOH)     |                      | 2-hydroxy-5-[1-(4-hydroxy-3-phenylphenyl)-1-methyl-ethyl]benzoic acid    |
|           | product 5 <sub>BPPH</sub><br>(BPPH-2xCOOH)   |                      | 5-[1-(3-carboxy-4-hydroxy-phenyl)-1-methyl-ethyl]-2-hydroxy-benzoic acid |
| BPZ       | product I <sub>BPZ</sub><br>(BPZ-OH)         |                      | 4-[1-(4-hydroxyphenyl)-cyclohexyl]benzene-1,2-diol                       |
|           | product II <sub>BPZ</sub><br>(BPZ-2xOH)      |                      | 4-[1-(3,4-dihydroxyphenyl)-cyclohexyl]benzene-1,2-diol                   |
|           | product III <sub>BPZ</sub><br>(BPZ-COOH)     |                      | 4-[1-(4-hydroxyphenyl)-cyclohexyl]-6-oxo-pyran-2-carboxylic acid         |
|           | product VI <sub>BPZ</sub><br>(BPZ-COOH-OH)   |                      | 4-[1-(3,4-dihydroxyphenyl)-cyclohexyl]-6-oxo-pyran-2-carboxylic acid     |



Table S10: List of products formed during incubation of *Cupriavidus basilensis* SBUG 290 with BPAP, BPC, BPZ and BPPH, but not characterized due to their low concentration

| Bisphenol | Uncharacterized product | HPLC retention time [min] | UV-Vis absorption maxima [nm] |
|-----------|-------------------------|---------------------------|-------------------------------|
| BPAP      | a                       | 7.7                       | 216, 280                      |
|           | b                       | 7.0                       | 218, 278                      |
|           | c                       | 6.0                       | 220, 280                      |
| BPC       | a                       | 9.4                       | 224, 272, 406                 |
| BPZ       | a                       | 6.9                       | 230, 278                      |
| BPPH      | a                       | 11.2                      | 216, 232, 314                 |
|           | b                       | 10.7                      | 220, 246, 320                 |
|           | c                       | 10.3                      | 222, 250, 320                 |
|           | d                       | 10.1                      | 222, 248, 318                 |
|           | e                       | 9.3                       | 222, 248, 320                 |
|           | f                       | 8.7                       | 238, 314                      |
|           | g                       | 5.6                       | 222, 280                      |

Table S11: GC-MS and HPLC-MS data of products formed during the incubation of *Cupriavidus basilensis* SBUG 290 with BPC in comparison to product I<sub>BPA</sub> and BPA (Zühlke et al. 2017). Chemical structure of products is given in Table S9 (page 15/16)

| bisphenol | molecular weight (g mol <sup>-1</sup> ) | product                  | theoretical molecular weight (g mol <sup>-1</sup> ) | mass difference between bisphenol and transformation product | HPLC-MS data of the transformation products |                                      | Base peak ion (GC-MS) and if applicable number of methylated derivatives <sup>b</sup>                                                                                   |
|-----------|-----------------------------------------|--------------------------|-----------------------------------------------------|--------------------------------------------------------------|---------------------------------------------|--------------------------------------|-------------------------------------------------------------------------------------------------------------------------------------------------------------------------|
|           |                                         |                          |                                                     |                                                              | negative ion mode [M-H] <sup>-</sup>        | positive ion mode [M+H] <sup>+</sup> |                                                                                                                                                                         |
| BPA       | 228                                     | product I <sub>BPA</sub> | 244                                                 | Δ16 g mol <sup>-1</sup>                                      | <i>m/z</i> 243                              | n.d.                                 | 3x <i>m/z</i> 258 (M <sup>+</sup> +1CH <sub>3</sub> )<br>3x <i>m/z</i> 272 (M <sup>+</sup> +2CH <sub>3</sub> )<br>1x <i>m/z</i> 286 (M <sup>+</sup> +3CH <sub>3</sub> ) |
| BPC       | 256                                     | product I <sub>BPC</sub> | 272                                                 | Δ16 g mol <sup>-1</sup>                                      | <sup>a</sup> <i>m/z</i> 269                 | n.d.                                 | <i>m/z</i> 272 (M <sup>+</sup> )                                                                                                                                        |
| BPC       | 256                                     | product 1 <sub>BPC</sub> | 272                                                 | Δ16 g mol <sup>-1</sup>                                      | n.d.                                        | n.d.                                 | 1 x <i>m/z</i> 286 (M <sup>+</sup> +CH <sub>3</sub> )                                                                                                                   |
| BPC       | 256                                     | product 2 <sub>BPC</sub> | 286                                                 | Δ30 g mol <sup>-1</sup>                                      | n.d.                                        | <i>m/z</i> 287                       | <i>m/z</i> 286 (M <sup>+</sup> )<br><i>m/z</i> 300 (M <sup>+</sup> +1CH <sub>3</sub> )                                                                                  |
| BPC       | 256                                     | product 3 <sub>BPC</sub> | 288                                                 | Δ32 g mol <sup>-1</sup>                                      | <sup>a</sup> <i>m/z</i> 285                 | n.d.                                 | n.d.                                                                                                                                                                    |

n.d. not detected; <sup>a</sup>HPLC-MS analysis detected an *ortho*-quinoid derivative of the product in the negative ion mode; <sup>b</sup>M<sup>+</sup>+1CH<sub>3</sub> monomethylated-, M<sup>+</sup>+2CH<sub>3</sub> dimethylated- or M<sup>+</sup>+3CH<sub>3</sub> trimethylated-derivative, 1-3x refers to number of detected derivatized substances: hydroxyl, hydroxymethyl or carboxyl groups within the molecule (see Table S 9) allow two up to four methylations and different combinations thereof to be detected by GC-MS

Table S 12: NMR data and structure of product I<sub>BPC</sub> (BPC-OH) formed during the incubation of *Cupriavidus basilensis* SBUG 290 with BPC

| <sup>1</sup> H                             | <sup>1</sup> H- <sup>13</sup> C-Correlation | <sup>13</sup> C | Structure |
|--------------------------------------------|---------------------------------------------|-----------------|-----------|
| 1.53, s, 6H, H-8/H-9                       | 31.7, 42.6, 143.4 , 144.1                   | not performed   |           |
| 2.12, s, 3H, H-16 or H-17                  | 124.6 , 130.5 , 154.2                       |                 |           |
| 2.14, s, 3H, H-16 or H-17                  | 121.0 , 125.0 , 142.1                       |                 |           |
| 6.46, s, 1H, H-4 or H-6                    | 42.6, 121.0, 142.1, 145.5                   |                 |           |
| 6.47, s, 1H, H-4 or H-6                    | 16.3, 42.6 , 113.1, 142.1                   |                 |           |
| 6.61, d, J = 8.3 Hz, 1H, H-14              | 124.6, 143.4, 154.2                         |                 |           |
| 6.85, dd, J = 8.2 Hz, J = 2.3 Hz, 1H, H-15 | 42.6, 130.5, 154.2                          |                 |           |
| 6.89, d(s), 1H, H-11                       | 16.3, 42.6, 126.1, 154.2                    |                 |           |
| 1.53, s, 6H, H-8/H-9                       | 31.7, 42.6, 143.4 , 144.1                   |                 |           |

Table S13: NMR data and structure of product 1<sub>BPC</sub> (BPC-CH<sub>2</sub>OH) formed during the incubation of *Cupriavidus basilensis* SBUG 290 with BPC

| <sup>1</sup> H                             | <sup>1</sup> H- <sup>13</sup> C-correlation                                     | <sup>13</sup> C | structure |
|--------------------------------------------|---------------------------------------------------------------------------------|-----------------|-----------|
| 1.58, s, 6H, H-8/H-9                       | 31.7 C-8/C-9, 42.6 C-7, 143.5 C-10, 143.6 C-4                                   | 31.7 C-8/C-9    |           |
| 2.11, s, 3H, H-17                          | 125.3 C-12, 130.0 C-11, 154.4 C-13                                              | 16.3 C-17       |           |
| 4.60, s, 2H, H-16                          | ((115.3 C-6)), 127.8 C-3, 154.2 C-1                                             | 61.4 C-16       |           |
| 6.61, d, J = 8.3 Hz, 1H, H-14              | ((16.3 C-17)), ((42.6 C-7)), 125.3 C-12, (130.0 C-11), 143.5 C-10, (154.4 C-13) | 114.8 C-14      |           |
| 6.65, d, J = 8.4 Hz, 1H, H-6               | (61.4 C-16), 127.7 C-2, 143.6 C-4, (154.2 C-1)                                  | 115.3 C-6       |           |
| 6.86, dd, J = 8.3 Hz, J = 2.1 Hz, 1H, H-15 | 42.6 C-7, (125.3 C-12), 130.0 C-11, 154.4 C-13                                  | 125.8 C-15      |           |
| 6.89, d(s), J = 2.1 Hz, 1H, H-11           | 16.3 C-17, 42.6 C-7, 125.8 C-15, 154.4 C-13                                     | 130.0 C-11      |           |
| 6.95, dd, J = 8.4 Hz, J = 2.3 Hz, 1H, H-5  | 42.6 C-7, 127.8 C-3, 154.2 C-1                                                  | 127.6 C-5       |           |
| 7.14, d(s), J = 2.3 Hz, 1H, H-3            | 42.6 C-7, 61.4 C-16, (115.3 C-6), 127.6 C-5, 154.2 C-1                          | 127.8 C-3       |           |
|                                            |                                                                                 | 42.6 C-7        |           |
|                                            |                                                                                 | 125.3 C-12      |           |
|                                            |                                                                                 | 127.7 C-2       |           |
|                                            |                                                                                 | 143.6 C-4       |           |
|                                            |                                                                                 | 143.5 C-10      |           |
|                                            |                                                                                 | 154.2 C-1       |           |
|                                            |                                                                                 | 154.4 C-13      |           |

Table S14: NMR data and structure of product 2<sub>BPC</sub> (BPC-COOH) formed during the incubation of *Cupriavidus basilensis* SBUG 290 with BPC

| <sup>1</sup> H                             | <sup>1</sup> H- <sup>13</sup> C-Correlations                      | <sup>13</sup> C | structure |
|--------------------------------------------|-------------------------------------------------------------------|-----------------|-----------|
| 1.59, s, 6H, H-8/H-9                       | 31.5 C-8/C-9, 42.5 C-7, 142.7 C-10, 143.1 C-5                     | 31.5 C-8/C-9    |           |
| 2.12, s, 3H, H-17                          | ((115.1 C-14)), 124.9 C-12, 130.3 C-11, 154.3 C-13                | 16.5 C-17       |           |
| 6.63, d, J = 8.3 Hz, 1H, H-14              | ((16.5 C-17)), 124.9 C-12, (130.3 C-11), 142.7 C-10, (154.3 C-13) | 115.1 C-14      |           |
| 6.75, d, J = 8.6 Hz, 1H, H-3               | 115.0 C-1, 143.1 C-5, 160.9 C-2, (174.3 C-16)                     | 117.4 C-3       |           |
| 6.85, dd, J = 8.3 Hz, J = 1.9 Hz, 1H, H-15 | 42.5 C-7, 130.3 C-11, 154.3 C-13                                  | 125.9 C-15      |           |
| 6.90, d(s), J = 1.9 Hz, 1H, H-11           | 16.5 C-17, 42.5 C-7, 125.9 C-15, 154.3 C-13                       | 130.3 C-11      |           |
| 7.20, dd, J = 8.6 Hz, J = 1.8 Hz, 1H, H-4  | 42.5 C-7, 128.8 C-6, 160.9 C-2                                    | 135.2 C-4       |           |
| 7.80, d(s), J = 1.8 Hz, 1H, H-6            | 42.5 C-7, 135.2 C-4, 160.9 C-2, 174.3 C-16                        | 128.8 C-6       |           |
|                                            |                                                                   | 42.5 C-7        |           |
|                                            |                                                                   | 115.0 C-1       |           |
|                                            |                                                                   | 124.9 C-12      |           |
|                                            |                                                                   | 142.7 C-10      |           |
|                                            |                                                                   | 143.1 C-5       |           |
|                                            |                                                                   | 154.3 C-13      |           |
|                                            |                                                                   | 160.9 C-2       |           |
|                                            |                                                                   | 174.3 C-16      |           |

Table S 15: NMR data and structure of BPPH

| <sup>1</sup> H                                  | <sup>1</sup> H- <sup>13</sup> C-correlation               | <sup>13</sup> C | structure |
|-------------------------------------------------|-----------------------------------------------------------|-----------------|-----------|
| 1.68, s, 6H, H-8/H-9                            | 31.7 C-8/C-9, 42.7 C-7, 143.8 C-4                         | 31.7 C-8/C-9    |           |
| 6.82, d, J = 8.5 Hz, 2H, H-6                    | 129.3 C-2, 143.8 C-4, (152.9 C-1)                         | 116.6 C-6       |           |
| 7.08, m, J = 8.5 Hz, J = 2.3 Hz, 2H, H-5        | 42.7 C-7, ((116.6 C-6)), 130.2 C-3, 152.9 C-1             | 127.9 C-5       |           |
| 7.15, d(s), J = 2.3 Hz, 2H, H-3                 | 42.7 C-7, ((116.6 C-6)), 127.9 C-5, 140.7 C-10, 152.9 C-1 | 130.2 C-3       |           |
| 7.26, t, J = 7.3 Hz, 2H, H-13                   | 130.4 C-11/C-15, ((140.7 C-10))                           | 127.5 C-13      |           |
| 7.36, dd, J = 7.3 Hz, J = 7.5 Hz, 4H, H-12/H-14 | 129.0 C-12/C-14, 140.7 C-10                               | 129.0 C-12/C-14 |           |
| 7.50, d, J = 7.5 Hz, 4H, H-11/H-15              | 127.5 C-13, 130.4 C-11/C-15                               | 130.4 C-11/C-15 |           |
|                                                 |                                                           | 42.7 C-7        |           |
|                                                 |                                                           | 129.3 C-2       |           |
|                                                 |                                                           | 140.7 C-10      |           |
|                                                 |                                                           | 143.8 C-4       |           |
|                                                 |                                                           | 152.9 C-1       |           |

Table S 16: NMR data and structure of product 2<sub>BPPH</sub> (BPPH-COOH) formed during the incubation of *Cupriavidus basilensis* SBUG 290 with BPPH

| <sup>1</sup> H                                  | <sup>13</sup> C | Rings | structure |
|-------------------------------------------------|-----------------|-------|-----------|
| 1.67, s, 6H, H-9/H-10                           | 31.4 C-9/C-10   |       |           |
| 6.83, d, J = 8.6 Hz, 1H, H-15                   | 116.7 C-15      | B     |           |
| 6.84, d, J = 8,8 Hz, 1H, H-3                    | 117.8 C-3       | A     |           |
| 7.03, m, J = 8.6 Hz, J = 2.5 Hz, 1H, H-16       | 127.8 C-16      | B     |           |
| 7.11, d(s), J = 2.5 Hz, 1H, H-12                | 130.0 C-12      | B     |           |
| 7.27, t, J = 7.4 Hz, 1H, H-20                   | 127.6 C-20      | C     |           |
| 7.34, m, J = 8.8 Hz, J = 2.5 Hz, 1H, H-4        | 135.8 C-4       | A     |           |
| 7.37, dd, J = 7.4 Hz, J = 7.9 Hz, 2H, H-19/H-21 | 129.0 C-19/C-21 | C     |           |
| 7.49, d, J = 7.9 Hz, 2H, H-18/H-22              | 130.4 C-18/C-22 | C     |           |
| 7.86, d(s), J = 2.5 Hz, 1H, H-6                 | 128.7 C-6       | A     |           |
|                                                 | 42.7 C-8        |       |           |
|                                                 | 113.2 C-1       | A     |           |
|                                                 | 128.7           |       |           |
|                                                 | 129.4           |       |           |
|                                                 | 143.0           |       |           |
|                                                 | 153.1 C-14      | B     |           |
|                                                 | 161.0 C-2       | A     |           |
|                                                 | 173.7 C-7       |       |           |

Table S17: Comparison of NMR data and structure of product 5<sub>BPPH</sub> (BPPH-2xCOOH) and product 2<sub>BPPH</sub> (BPPH-COOH) formed during the incubation of *Cupriavidus basilensis* SBUG 290 with BPPH as well as product 2<sub>BPC</sub> (BPC-COOH) formed during the incubation of *Cupriavidus basilensis* SBUG 290 with BPC

| product 5 <sub>BPPH</sub>                                                                                                                  | product 2 <sub>BPC</sub>                                                                                                                    | product 2 <sub>BPPH</sub>                                                                                                                  |
|--------------------------------------------------------------------------------------------------------------------------------------------|---------------------------------------------------------------------------------------------------------------------------------------------|--------------------------------------------------------------------------------------------------------------------------------------------|
| <sup>1</sup> H NMR (ring A)                                                                                                                | <sup>1</sup> H NMR (ring A)                                                                                                                 | <sup>1</sup> H NMR (ring A)                                                                                                                |
| 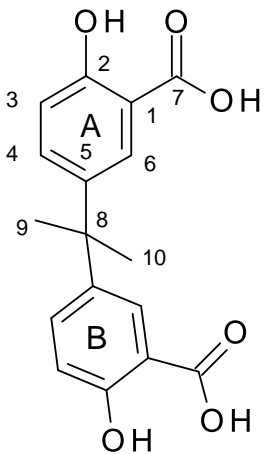                                                          |                                                          |                                                         |
| <p>6.83, d, J = 8,7 Hz, 1H, H-3<br/>           7.28, m, J = 8.7 Hz, J = 2.5 Hz, 1H, H-4<br/>           7.86, d(s), J = 2.5 Hz, 1H, H-6</p> | <p>6.75, d, J = 8.6 Hz, 1H, H-3<br/>           7.20, dd, J = 8.6 Hz, J = 1.8 Hz, 1H, H-4<br/>           7.80, d(s), J = 1.8 Hz, 1H, H-6</p> | <p>6.84, d, J = 8,8 Hz, 1H, H-3<br/>           7.34, m, J = 8.8 Hz, J = 2.5 Hz, 1H, H-4<br/>           7.86, d(s), J = 2.5 Hz, 1H, H-6</p> |



Table S18: GC-MS and HPLC-MS data of the two major products formed during the incubation of *Cupriavidus basilensis* SBUG 290 with BPPH. Chemical structures and names of products are given in Table S9 (page 15/16)

| bisphenol | molecular weight (g mol <sup>-1</sup> ) | product                   | theoretical molecular weight (g mol <sup>-1</sup> ) | mass difference between bisphenol and transformation product | HPLC-MS data of the transformation products |                                      | Base peak ion (GC-MS) and if applicable number of methylated derivatives |
|-----------|-----------------------------------------|---------------------------|-----------------------------------------------------|--------------------------------------------------------------|---------------------------------------------|--------------------------------------|--------------------------------------------------------------------------|
|           |                                         |                           |                                                     |                                                              | negative ion mode [M-H] <sup>-</sup>        | positive ion mode [M+H] <sup>+</sup> |                                                                          |
| BPPH      | 380                                     | product 2 <sub>BPPH</sub> | 348                                                 | Δ32                                                          | <i>m/z</i> 347                              | <i>m/z</i> 349                       | n.d.                                                                     |
| BPPH      | 380                                     | product 5 <sub>BPPH</sub> | 316                                                 | Δ64                                                          | <i>m/z</i> 315                              | <i>m/z</i> 317                       | n.d.                                                                     |

n.d. not detected

## REFERENCES

Zühlke M-K, Schlüter R, Mikolasch A, Zühlke D, Giersberg M, Schindler H, Henning A-K, Frenzel H, Hammer E, Lalk M (2017) Biotransformation and reduction of estrogenicity of bisphenol A by the biphenyl-degrading *Cupriavidus basilensis*. Appl Microbiol Biotechnol 101(9):3743-3758
